# Supplementary material for: Dye-sensitized solar cells with TiO2 nano-particles on TiO2 nano-tube-grown Ti substrates
Source: Royal Society of Chemistry journal article supplement (doi:10.1039/c0jm04210b), 2011-01-01
Supplement: c0jm04210b.pdf [file c0jm04210b.pdf]

Supplementary Data

**Dye-sensitized solar cells with TiO<sub>2</sub> nano-particles on TiO<sub>2</sub>  
nano-tube-grown Ti substrates**

**Ho-Gyeong Yun,\* et al.**

*Convergence and Components & Materials Research Lab., Electronics and Telecommunications  
Research Institute (ETRI), Daejeon, 305-350, Korea.*

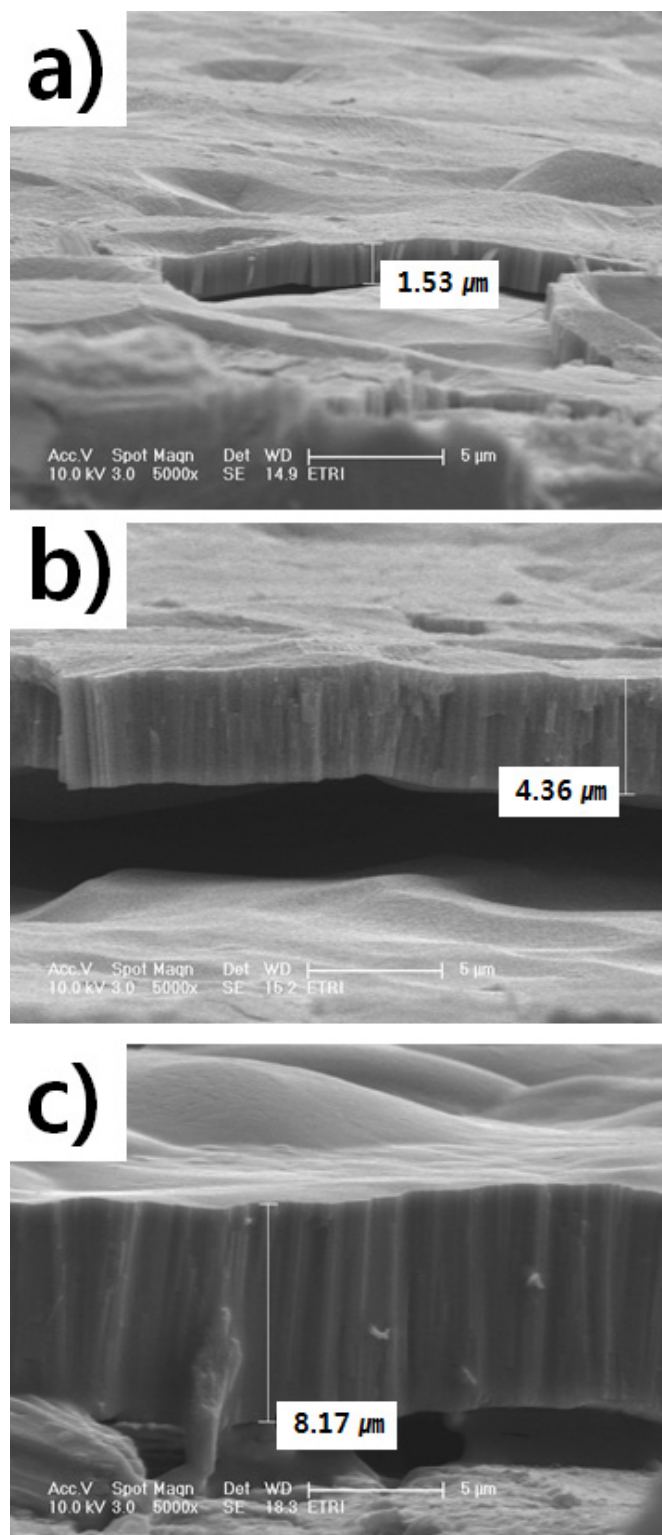

Figure S-1. Cross-sectional SEM images of the TiO<sub>2</sub> NT layer. The anodizing times were (a) 15 min, (b) 30 min, and (c) 60 min.
